# Supplementary material for: Navigating multi-predator dynamic risk landscapes in anthropogenic environments: spatio-temporal plasticity in roe deer habitat selection
Source: Research Square preprint supplement (doi:10.21203/rs.3.rs-6894046/v1), 2025-06-20

**Supporting information Appendix S1**

**Navigating multi-predator dynamic risk landscapes in anthropogenic environments: spatio-temporal plasticity in roe deer habitat selection**

Contents Supporting information Appendix S1

1. Table S1 Study site description
2. Table S2: Information on nr of steps per month and study site
3. Figure S1: Study sites hunting seasons separated by females and males
4. Figure S2: Step length and turning angle distribution
5. Table S3: Model outputs for diel and seasonal models
6. Figure S3: Boxplot of individual random effects per study site
7. Figures S4: Model results for sensitivity analyses
8. ***Table S1: Study site descriptions***HFI: Human footprint index (Venter et al. 2016), NDVI: Normalized difference vegetation index (Pettorelli et al. 2005). Prop. Forest: proportion of forest in each study site estimated by the proportion of random steps located in forest (see Methods for more details). Legend: ‘*’ denotes sites where drive hunts with dogs occur (Elsewhere: sit-and-wait hunting); ‘§’ denotes sites with wolf presence; ‘°’ denotes reintroduced populations

| **Study site** | **Nr animals** | **Nr steps** | **Mean Location** | **Mean altitude** | **Prop. Forest** | **Mean HFI** | **Mean NDVI** | **Hunt**  **Ing** | **Lynx** | **Scena**  **rio** |
| --- | --- | --- | --- | --- | --- | --- | --- | --- | --- | --- |
|  |  |  |  |  |  |  |  |  |  |  |
| Brandenburg (DE) | 4 | 9746 | ( 12.485305 , 52.223412 ) | 98 | 0.87 | 6 | 6661 | 1 | 0 | 0, 1 |
| Bialowieza NP (PL) | 5 | 2761 | ( 23.468192 , 52.683928 ) | 130 | 0.71 | 11 | 4874 | 1 | 1§ | 2, 3 |
| Kaloe (DK) | 5 | 63801 | ( 10.478974 , 56.289928 ) | 29 | 0.17 | 19 | 5405 | 1* | 0 | 0, 1 |
| Montemuro (PT)° | 5 | 79496 | ( -7.86285 , 40.938433 ) | 846 | 0.15 | 11 | 6153 | 0 | 0§ | 0 |
| Hegau (DE) | 7 | 25585 | ( 8.727174 , 47.884143 ) | 772 | 0.51 | 19 | 5455 | 1* | 0 | 0, 1 |
| Chize (FR) | 8 | 10681 | ( -0.429731 , 46.117316 ) | 83 | 0.3 | 6 | 6944 | 0 | 0 | 0 |
| Matese(IT)° | 8 | 57998 | ( 14.257249 , 41.462717 ) | 1000 | 0.72 | 12 | 5864 | 0 | 0 | 0 |
| Aspromonte (IT)° | 10 | 52058 | ( 15.917424 , 38.206289 ) | 1149 | 0.78 | 10 | 6374 | 0 | 0§ | 0 |
| Trois Fontaines (FR) | 10 | 14597 | ( 4.916661 , 48.702951 ) | 181 | 0.6 | 7 | 6673 | 1 | 0 | 0, 1 |
| Grimso (SE) | 12 | 68486 | ( 15.445529 , 59.683848 ) | 120 | 0.91 | 7 | 3420 | 1 | 1 | 2, 3 |
| Arada (PT)° | 19 | 188848 | ( -8.190757 , 40.849826 ) | 950 | 0.43 | 4 | 6476 | 0 | 0§ | 0 |
| Koberg (SE) | 24 | 87434 | ( 12.429397 , 58.153109 ) | 94 | 0.76 | 12 | 3280 | 1 | 1§ | 2, 3 |
| Rhine Valley (DE) | 27 | 152865 | ( 7.953578 , 48.594346 ) | 139 | 0.36 | 21 | 5435 | 1* | 0 | 0, 1 |
| Cembra (IT) | 34 | 1431304 | ( 11.179565 , 46.123256 ) | 838 | 0.89 | 23 | 6457 | 1 | 0 | 0, 1 |
| Bavarian Forest NP (DE) | 67 | 480569 | ( 13.345103 , 48.940369 ) | 769 | 0.81 | 12 | 4193 | 1 | 1 | 2, 3 |
| Bernese Oberland(CH) | 69 | 3035809 | ( 7.54569 , 46.580196 ) | 1051 | 0.4 | 20 | 4307 | 1* | 1 | 2, 3 |
| Aurignac (FR) | 98 | 128909 | ( 0.884582 , 43.28619 ) | 317 | 0.14 | 10 | 6714 | 1* | 0 | 0, 1 |
|  |  |  |  |  |  |  |  |  |  |  |

1. ***Table S2: Information on nr of steps per month and study site***

| **Study site** | **Nr anim.** | **Nr steps** | **Jan** | **Feb** | **Sep** | **Oct** | **Nov** | **Dec** |
| --- | --- | --- | --- | --- | --- | --- | --- | --- |
|  |
| Aurignac – France | 98 | 128909 | 352 | 19250 | 45331 | 45540 | 9537 | 8899 |  |
| Bernese Oberland - Switzerland | 69 | 3035809 | 505477 | 549506 | 534136 | 510630 | 448909 | 487151 |  |
| Bavarian Forest National Park - Germany | 67 | 480569 | 119198 | 135669 | 56039 | 39311 | 51817 | 78535 |  |
| Cembra – Italy | 34 | 1431304 | 244198 | 303281 | 226402 | 218691 | 196867 | 241865 |  |
| Rhine Valley - Germany | 27 | 152865 | 23264 | 18260 | 28028 | 27411 | 26411 | 29491 |  |
| Koberg – Sweden | 24 | 87434 | 24167 | 40326 | 0 | 2640 | 2299 | 18002 |  |
| Arada – Portugal | 19 | 188848 | 21175 | 0 | 0 | 0 | 63173 | 104500 |  |
| Grimso – Sweden | 12 | 68486 | 34903 | 18678 | 0 | 0 | 0 | 14905 |  |
| Trois Fontaines - France | 10 | 14597 | 715 | 572 | 4741 | 4400 | 880 | 3289 |  |
| Aspromonte – Italy | 10 | 52058 | 0 | 23700 | 0 | 0 | 15213 | 13145 |  |
| Chize – France | 8 | 10681 | 231 | 0 | 3080 | 3256 | 2123 | 1991 |  |
| Matese – Italy | 8 | 57998 | 0 | 0 | 0 | 1914 | 33154 | 22930 |  |
| Hegau – Germany | 7 | 25585 | 6996 | 6226 | 3189 | 2937 | 1496 | 4741 |  |
| Bialowieza National Park - Poland | 5 | 2761 | 462 | 2299 | 0 | 0 | 0 | 0 |  |
| Kaloe – Denmark | 5 | 63801 | 7818 | 0 | 7744 | 9062 | 21998 | 17179 |  |
| Montemuro – Portugal | 5 | 79496 | 13090 | 0 | 0 | 0 | 26003 | 40403 |  |
| Brandeburg - Germany | 4 | 9746 | 55 | 1254 | 0 | 0 | 5951 | 2486 |  |
|  |  |  |  |  |  |  |  |  |  |

1. ***Figure S1: Study sites hunting seasons separated by females and males***


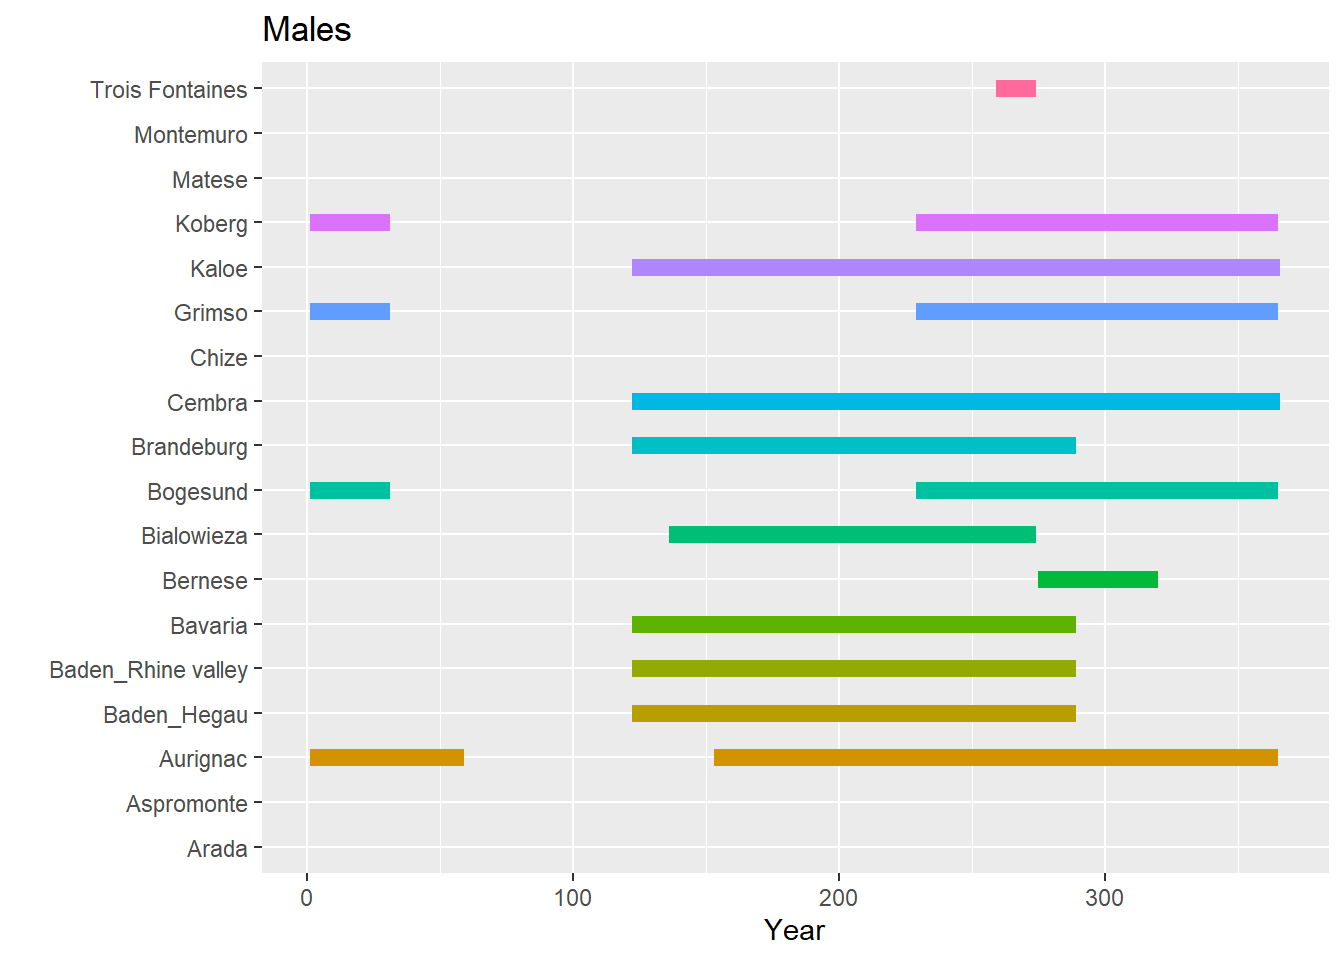


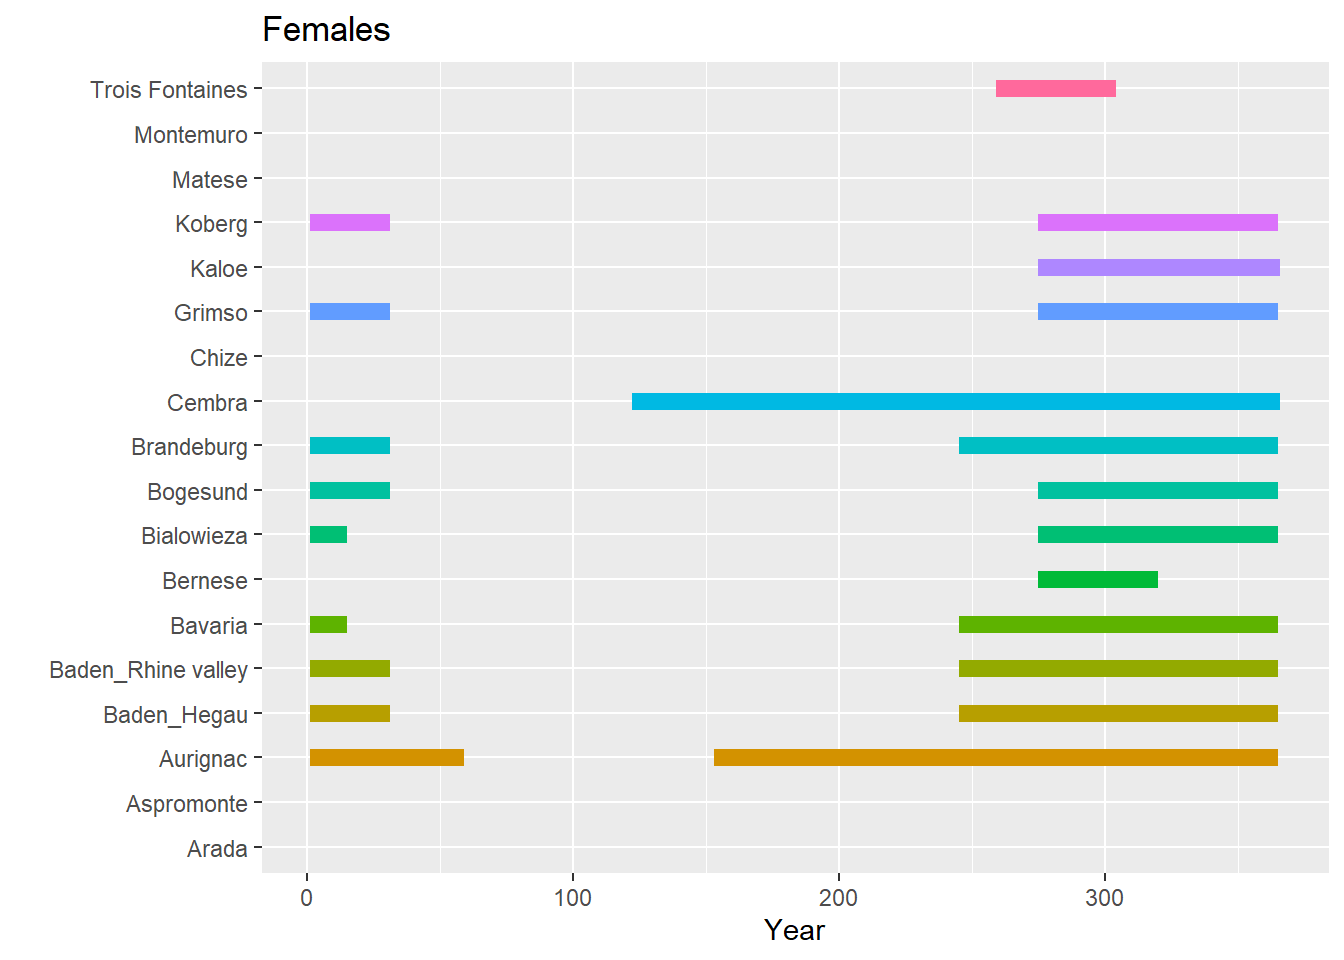


1. ***Figure S2: Step length and turning angle distribution***


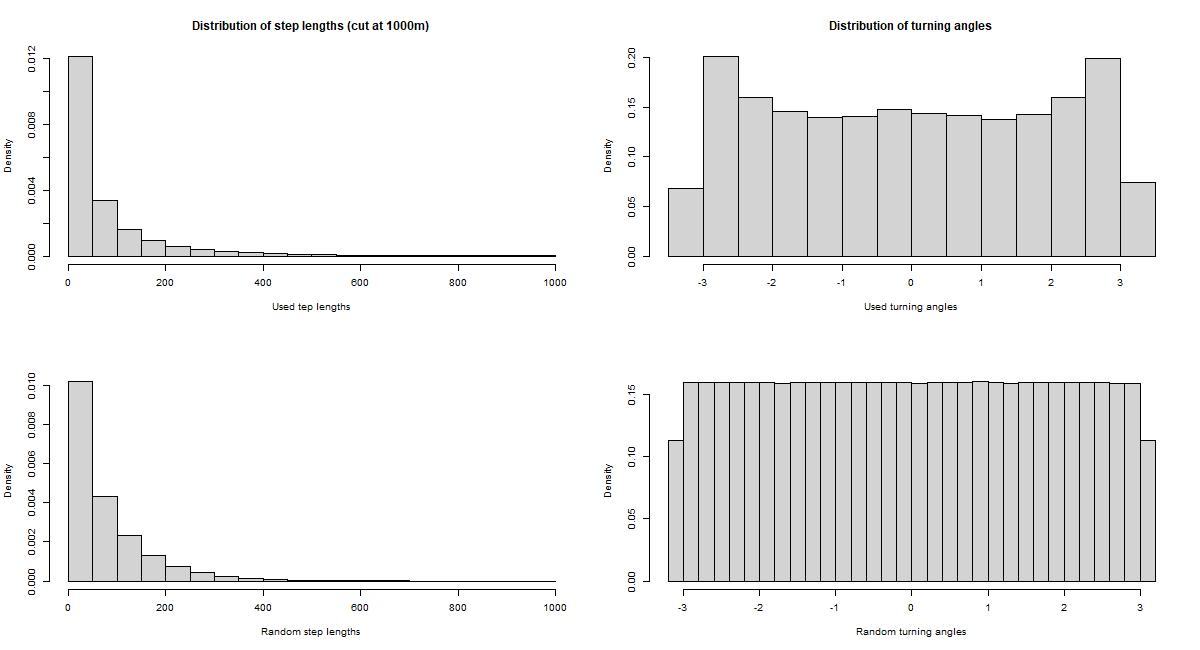


1. ***Table S4: Model outputs***

**Diel models**

|  | **Model terms** | **Coefficient** | **CI lower** | **CI upper** |
| --- | --- | --- | --- | --- |
| Day | Habitat | -0.567 | -0.743 | -0.391 |
|  | Habitat:Hunting | 0.048 | -0.133 | 0.228 |
|  | Habitat:Hunting:Lynx | -0.056 | -0.252 | 0.141 |
|  | Habitat:Hunting:Sex | 0.138 | -0.035 | 0.312 |
|  | Habitat:Lynx | -0.163 | -0.349 | 0.023 |
|  | Habitat:HFI | -0.166 | -0.251 | -0.08 |
|  | Habitat:NDVI | 0.173 | 0.117 | 0.229 |
|  | Habitat:Sex | -0.046 | -0.212 | 0.12 |
|  | Habitat:Season (Winter) | 0.024 | -0.083 | 0.13 |
|  | Log step lengths | -0.083 | -0.087 | -0.78 |
|  |  |  |  |  |
| Twilight | Habitat | -0.234 | -0.417 | -0.05 |
|  | Habitat:Hunting | 0.035 | -0.163 | 0.232 |
|  | Habitat:Hunting:Lynx | 0.014 | -0.202 | 0.23 |
|  | Habitat:Hunting:Sex | -0.009 | -0.19 | 0.173 |
|  | Habitat:Lynx | 0.071 | -0.121 | 0.264 |
|  | Habitat:HFI | -0.081 | -0.158 | -0.003 |
|  | Habitat:NDVI | 0.244 | 0.187 | 0.301 |
|  | Habitat:Sex | 0.071 | -0.084 | 0.227 |
|  | Habitat:Season (Winter) | -0.081 | -0.199 | 0.037 |
|  | Log step lengths | 0.211 | 0.203 | 0.218 |
|  |  |  |  |  |
| Night | Habitat | 0.046 | -0.11 | 0.202 |
|  | Habitat:Hunting | 0.094 | -0.066 | 0.255 |
|  | Habitat:Hunting:Lynx | -0.154 | -0.33 | 0.021 |
|  | Habitat:Hunting:Sex | 0.081 | -0.082 | 0.244 |
|  | Habitat:Lynx | 0.226 | 0.058 | 0.394 |
|  | Habitat:HFI | -0.001 | -0.075 | 0.074 |
|  | Habitat:NDVI | 0.256 | 0.208 | 0.305 |
|  | Habitat:Sex | -0.168 | -0.328 | -0.007 |
|  | Habitat:Season (Winter) | -0.26 | -0.365 | -0.155 |
|  | Log step lengths | -0.107 | -0.111 | -0.104 |

**Seasonal models**

|  | **Model terms** | **Coefficient** | **CI lower** | **CI upper** |
| --- | --- | --- | --- | --- |
| Fall | Habitat | 0.369 | 0.031 | 0.706 |
|  | Habitat:Hunting | -0.169 | -0.506 | 0.168 |
|  | Habitat:Hunting:Lynx | 0.153 | -0.192 | 0.498 |
|  | Habitat:Hunting:Sex | 0.069 | -0.075 | 0.213 |
|  | Habitat:Lynx | -0.055 | -0.416 | 0.306 |
|  | Habitat:HFI | -0.091 | -0.195 | 0.013 |
|  | Habitat:NDVI | 0.267 | 0.189 | 0.345 |
|  | Habitat:Sex | -0.177 | -0.385 | 0.03 |
|  | Habitat:Daytime (Day) | -0.838 | -0.958 | -0.719 |
|  | Habitat:Daytime (Twilight) | -0.339 | -0.453 | -0.225 |
|  | Log step lengths | -0.026 | -0.031 | -0.021 |
|  |  |  |  |  |
| Winter | Habitat | -0.217 | -0.351 | -0.083 |
|  | Habitat:Hunting | -0.018 | -0.164 | 0.129 |
|  | Habitat:Hunting:Lynx | -0.004 | -0.17 | 0.163 |
|  | Habitat:Hunting:Sex | 0.077 | -0.09 | 0.244 |
|  | Habitat:Lynx | 0.215 | 0.056 | 0.373 |
|  | Habitat:HFI | 0.01 | -0.067 | 0.086 |
|  | Habitat:NDVI | 0.277 | 0.22 | 0.333 |
|  | Habitat:Sex | -0.024 | -0.182 | 0.135 |
|  | Habitat:Daytime (Day) | -0.379 | -0.455 | -0.304 |
|  | Habitat:Daytime (Twilight) | -0.12 | -0.185 | -0.055 |
|  | Log step lengths | -0.063 | -0.067 | -0.06 |

1. ***Figure S3: Boxplots for the individual random components in the final models***

***Diel models***


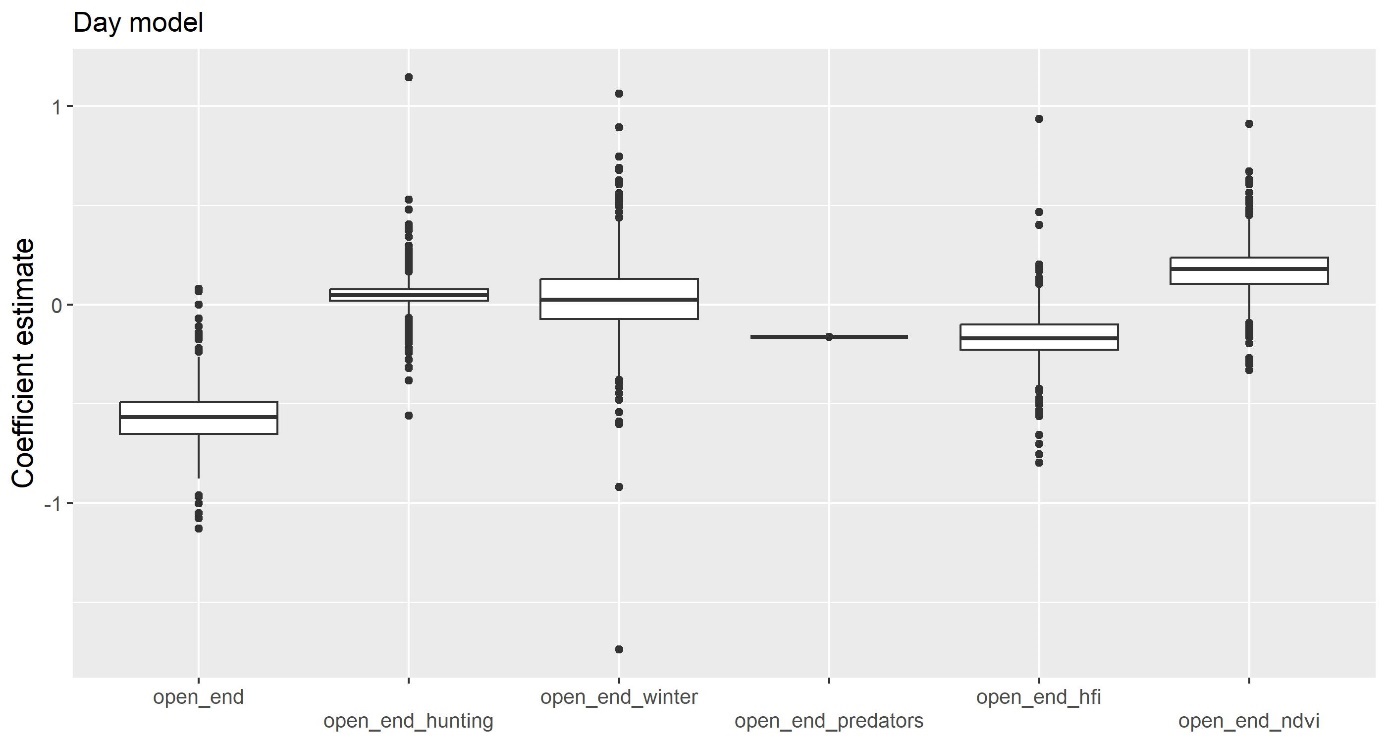


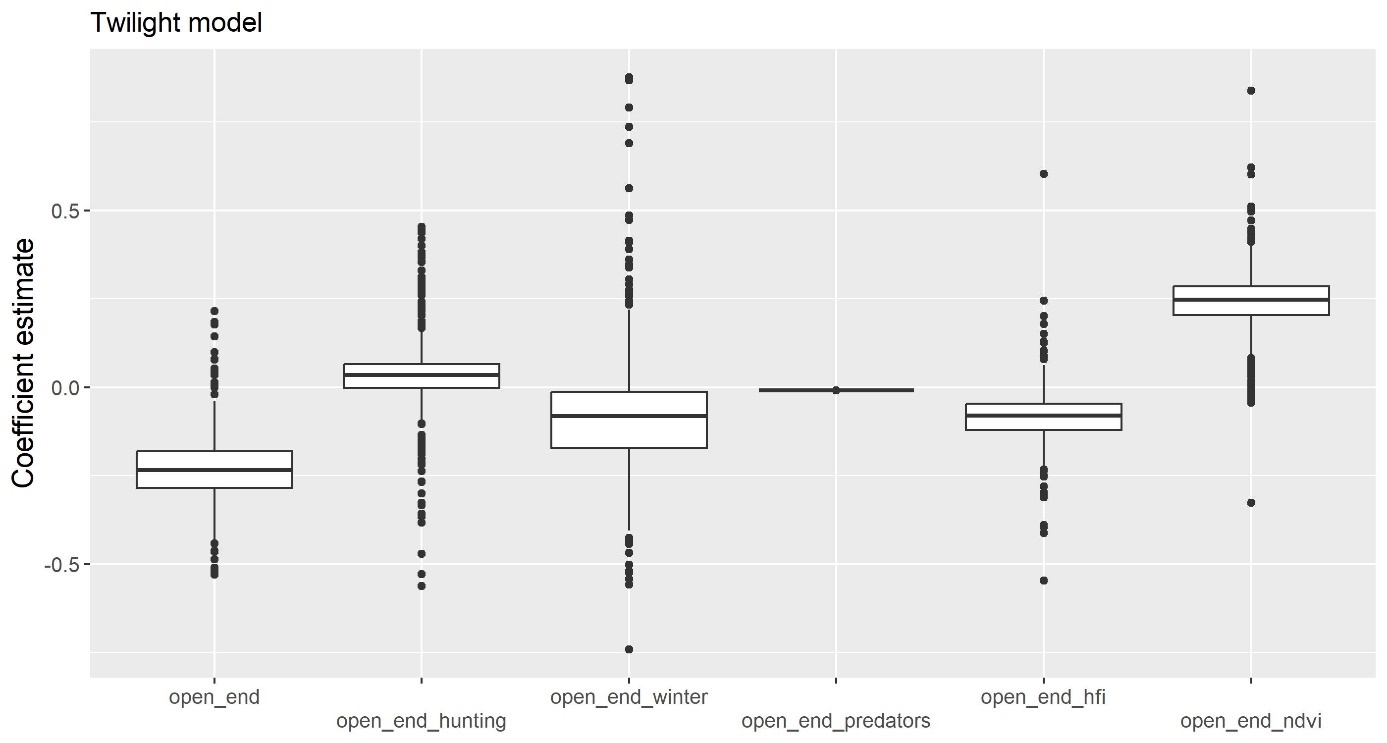


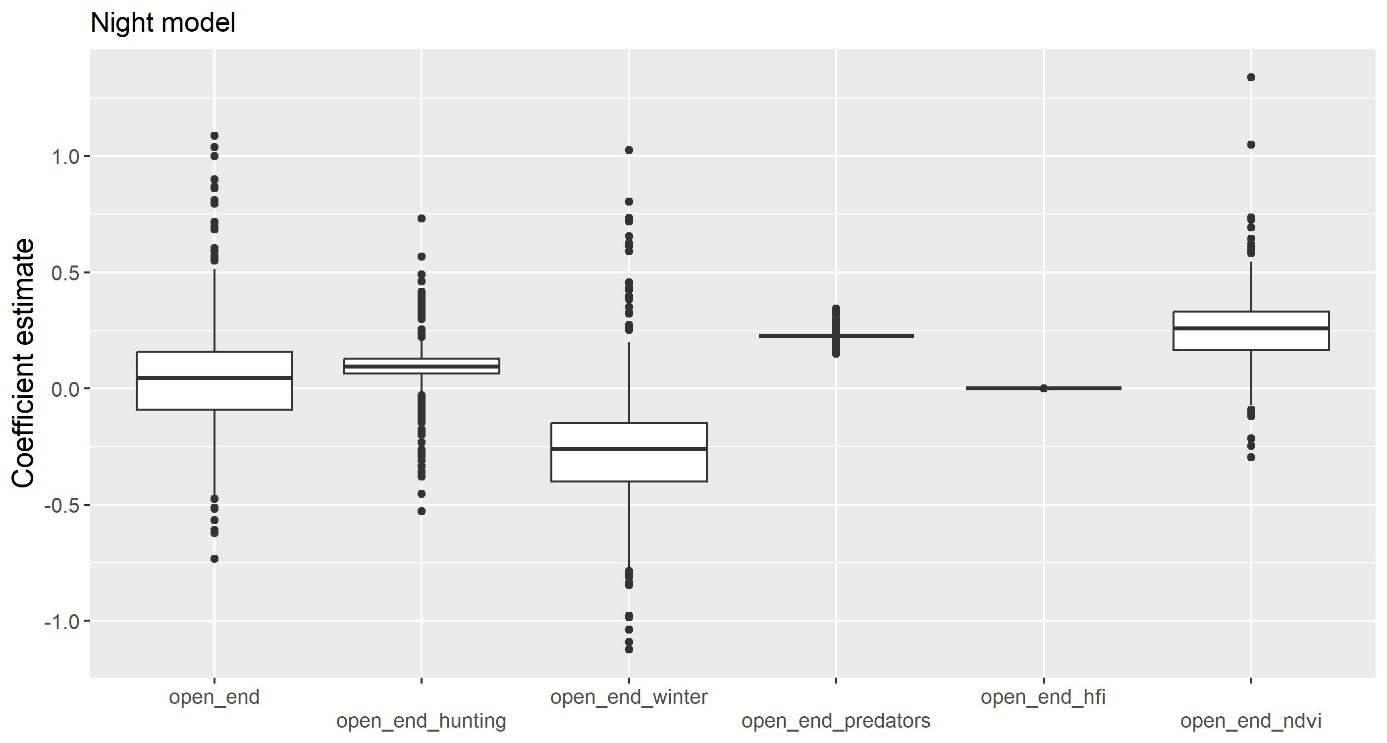


***Seasonal models***


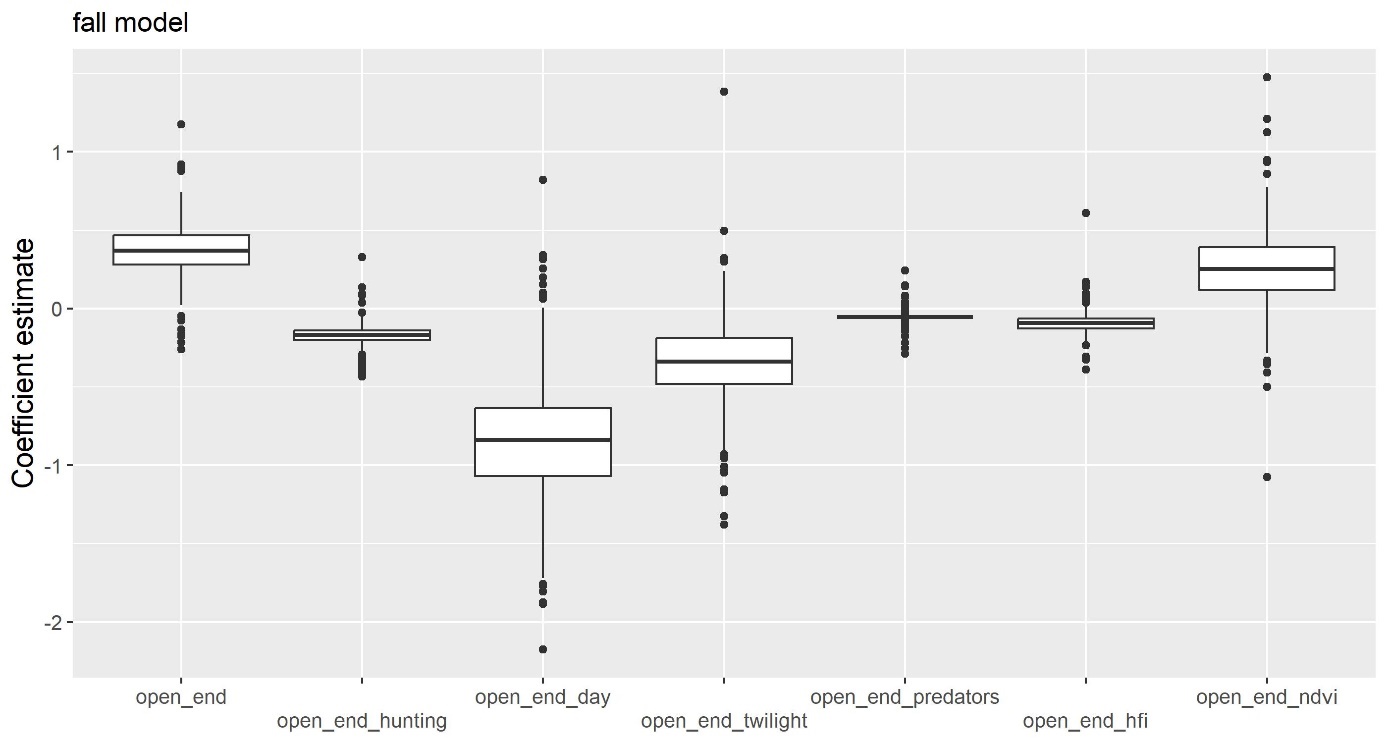


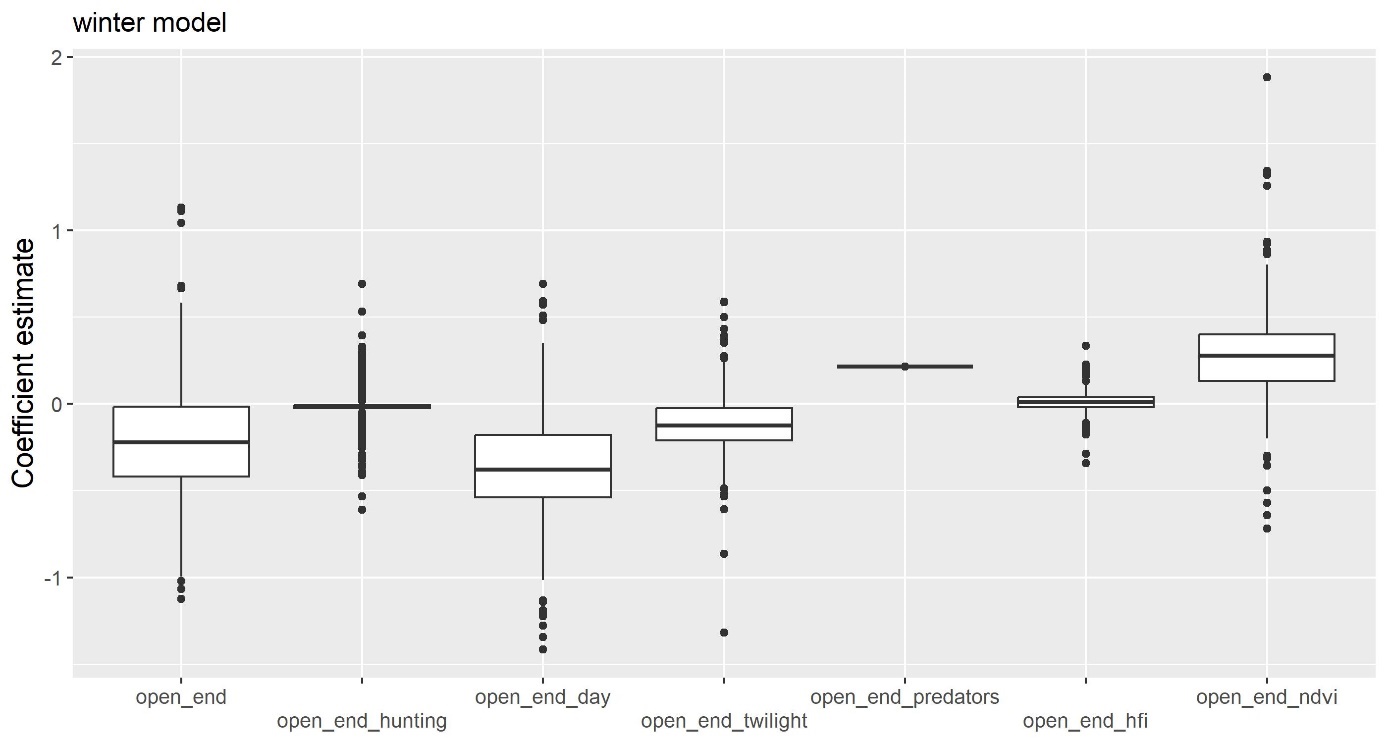


1. ***Figures S4: Sensitivity analysis***

To exclude the possibility that our findings were mainly driven by a few study sites, unbalanced data, or our choice for the tree cover density (TCD) threshold (40%) to separate open from forest habitat, we carefully tested the robustness of our findings towards input data and model specifications. We performed 8 set of diel models and 1 set of seasonal models (9 sensitivity models in total) and compared the beta coefficients for the different sensitivity models with the ones from the final models (5 models). The tested models were:

**Diel models S4 A**
1: final model; 2: omitting sex from the data; 3: omitting Aurignac FR (highest number of animals in the data; 4: omitting Bernese CH (highest number of steps in the data); 5: omitting study sites with introduced populations of roe deer (Arada PT, Aspromonte IT, Matese IT, Montemuro PT); 5: omitting study sites with wolves (Bialowieza NP PL, Montemuro PT, Aspromonte IT, Arada PT, Koberg SE); 6: threshold of TCD to separate open/forest at 30%; 7: threshold of TCD to separate open/forest at 50%; 8: TCD as a continuous predictor (i.e. percentage tree cover);
**Note**: the beta coefficients for model 8 (continuous TCD) are of *opposite sign* because we used forest as the reference category (i.e. we modelled selection of open habitat) for the dichotomous habitat variable (open/forest).

Habitat (forest as reference – except for continuous TCD)


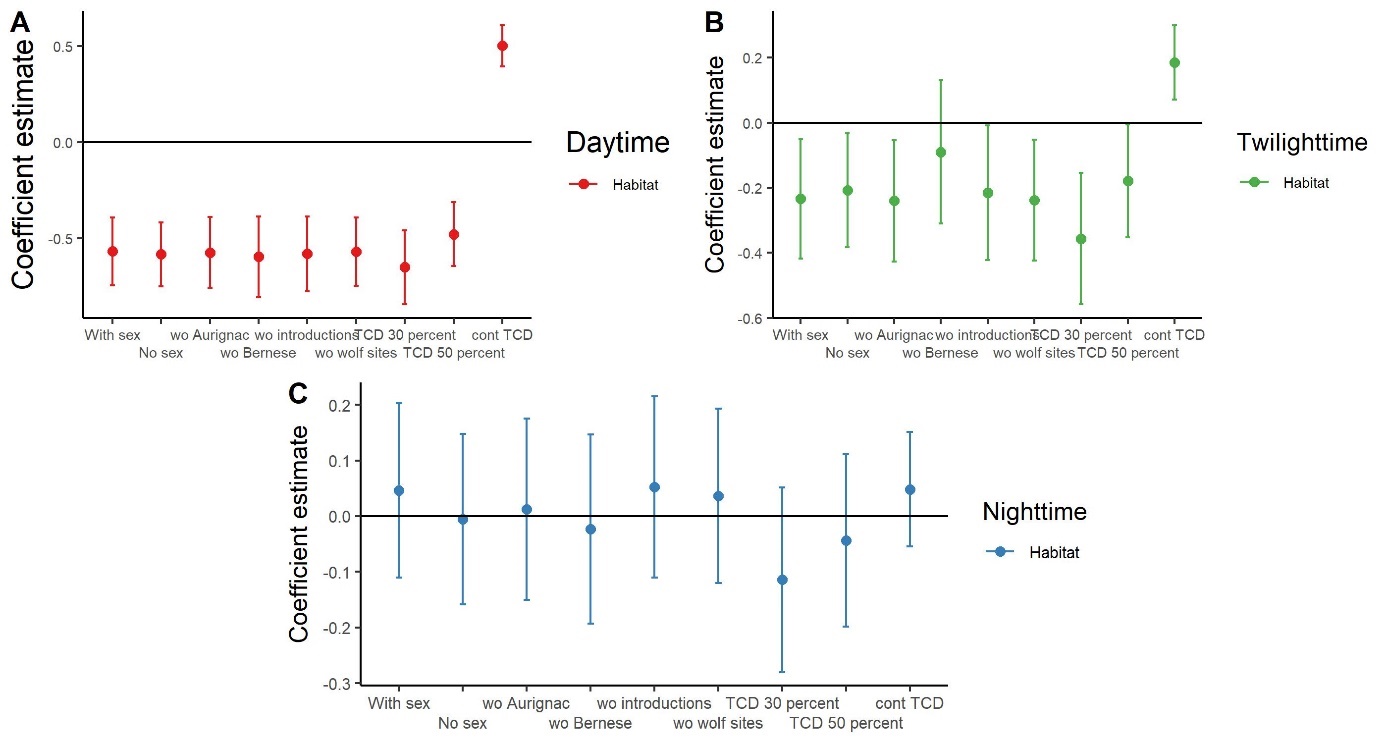


Habitat:Hunting


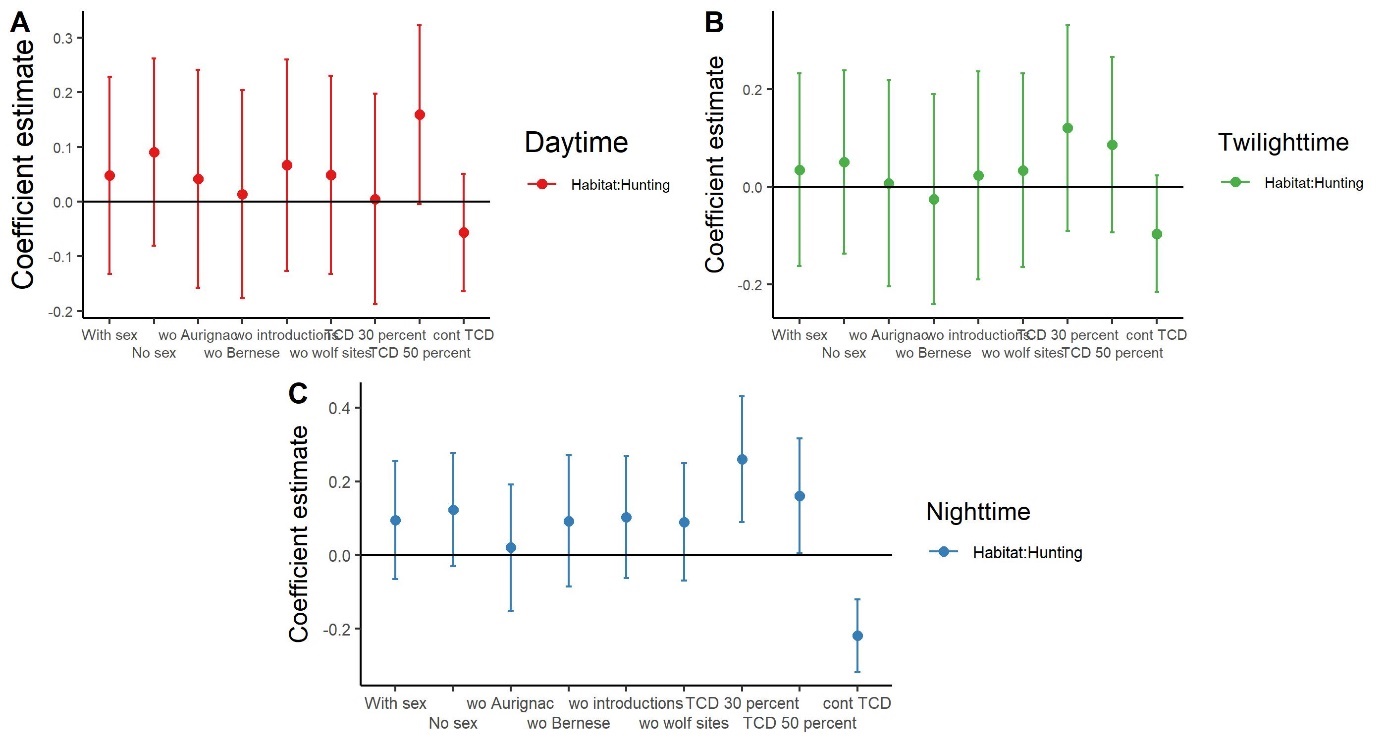


Habitat:Lynx


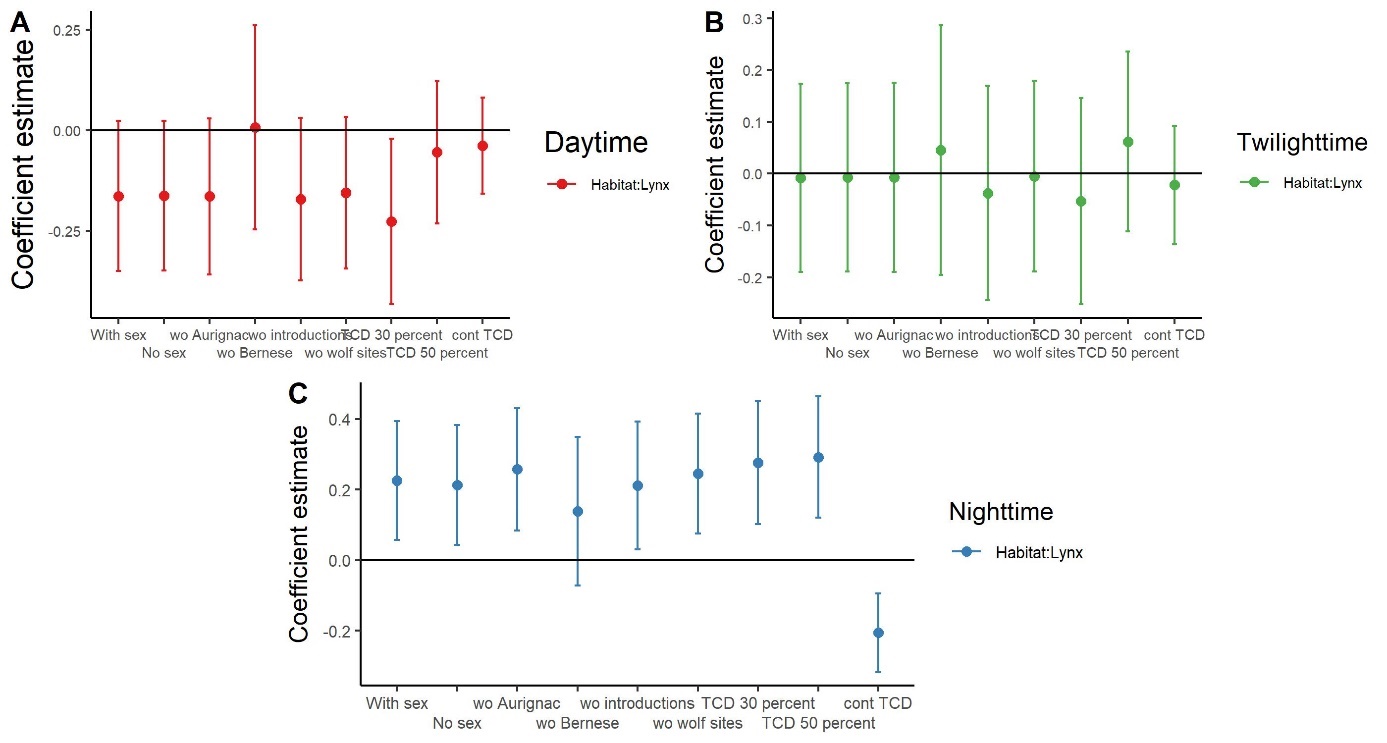


Habitat:Hunting:Lynx


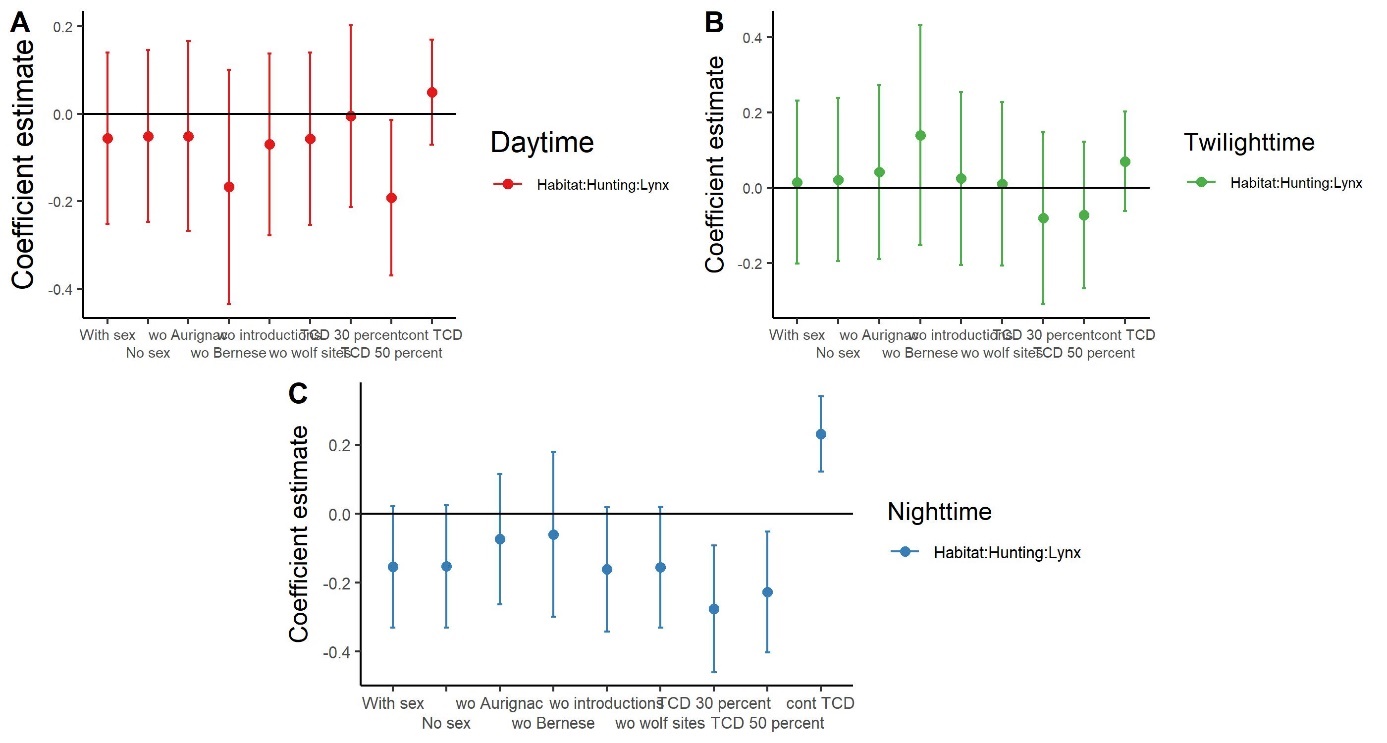


Habitat:Sex (female deer as reference category)


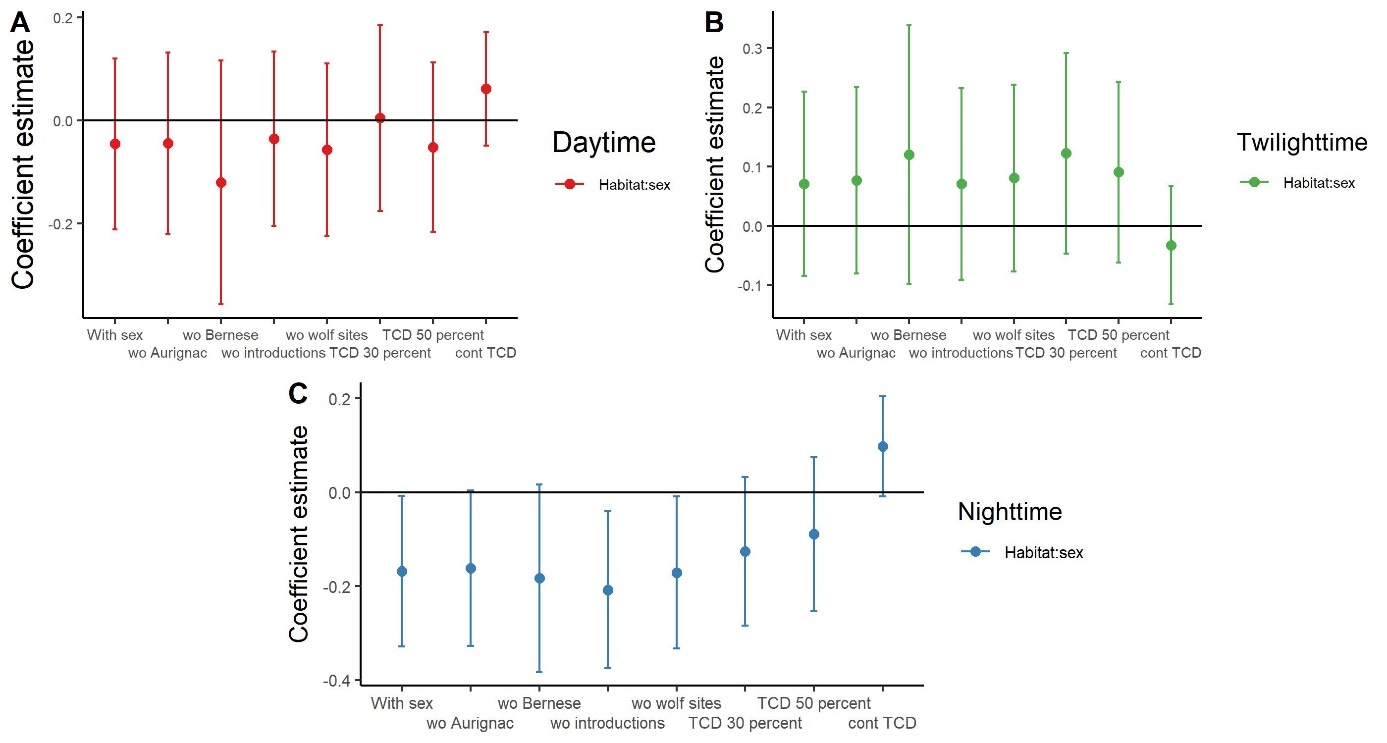


Habitat:Hunting:Sex


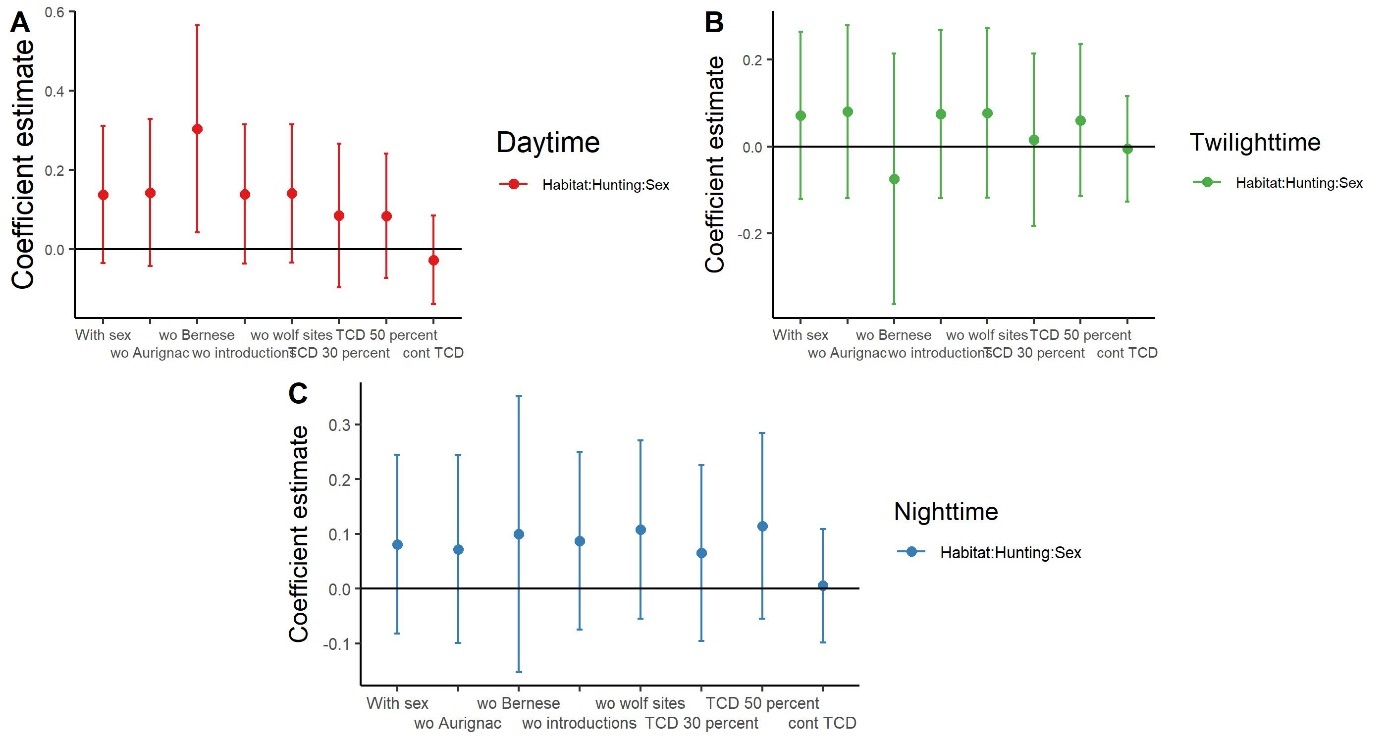


Habitat:HFI


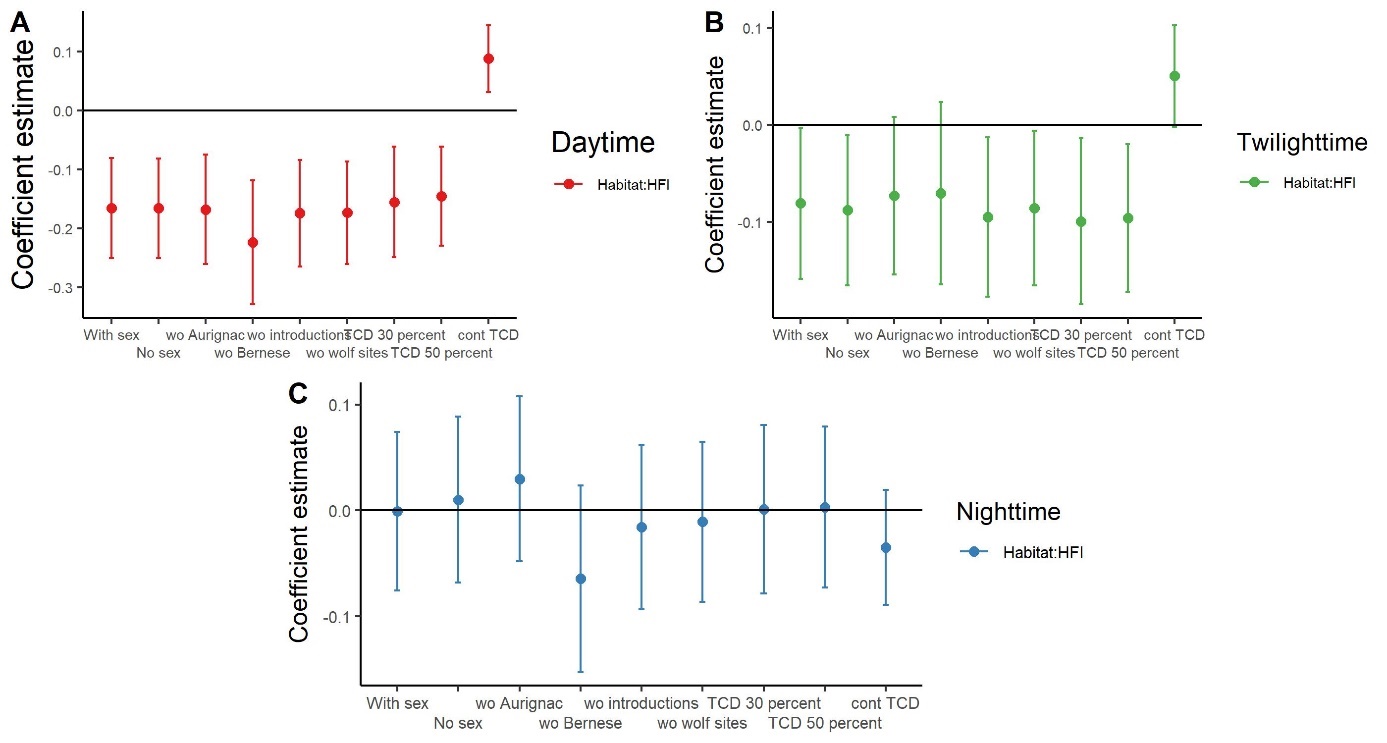


Habitat:NDVI


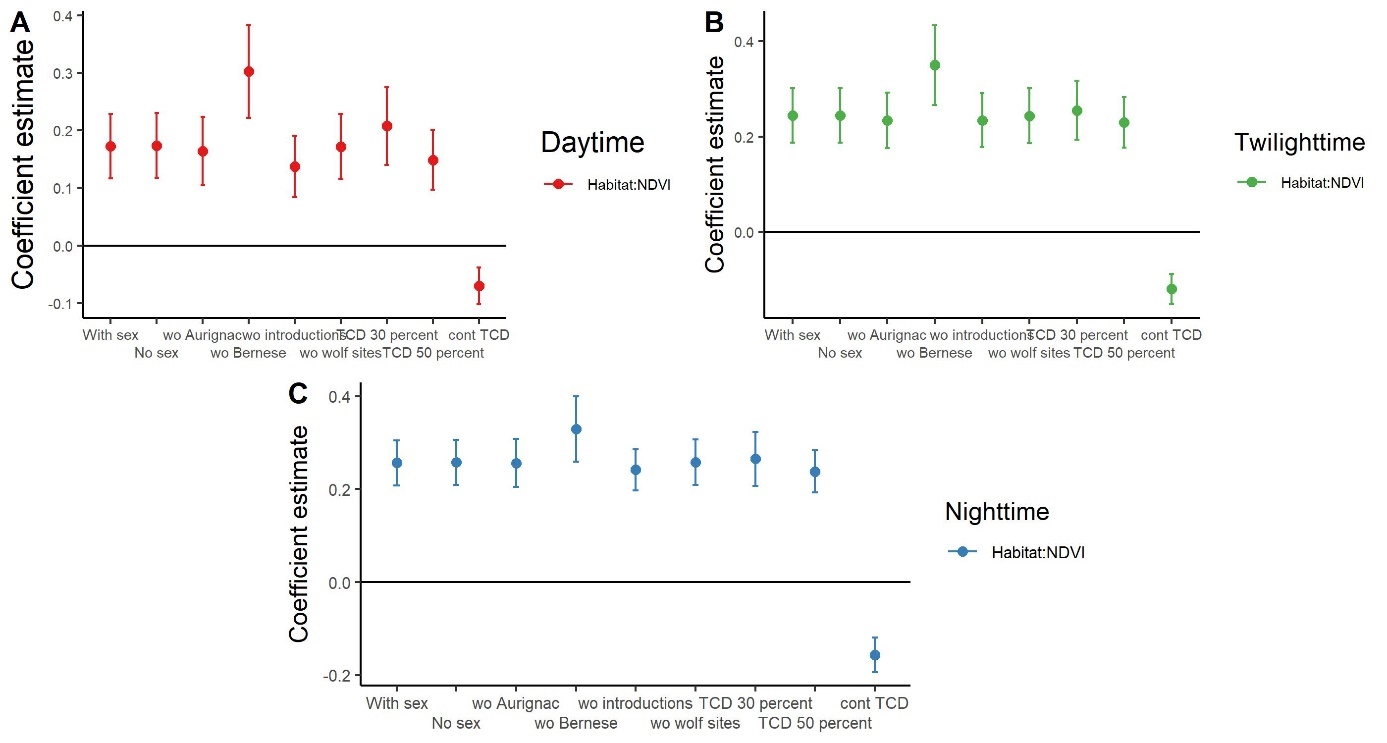


Habitat:Season


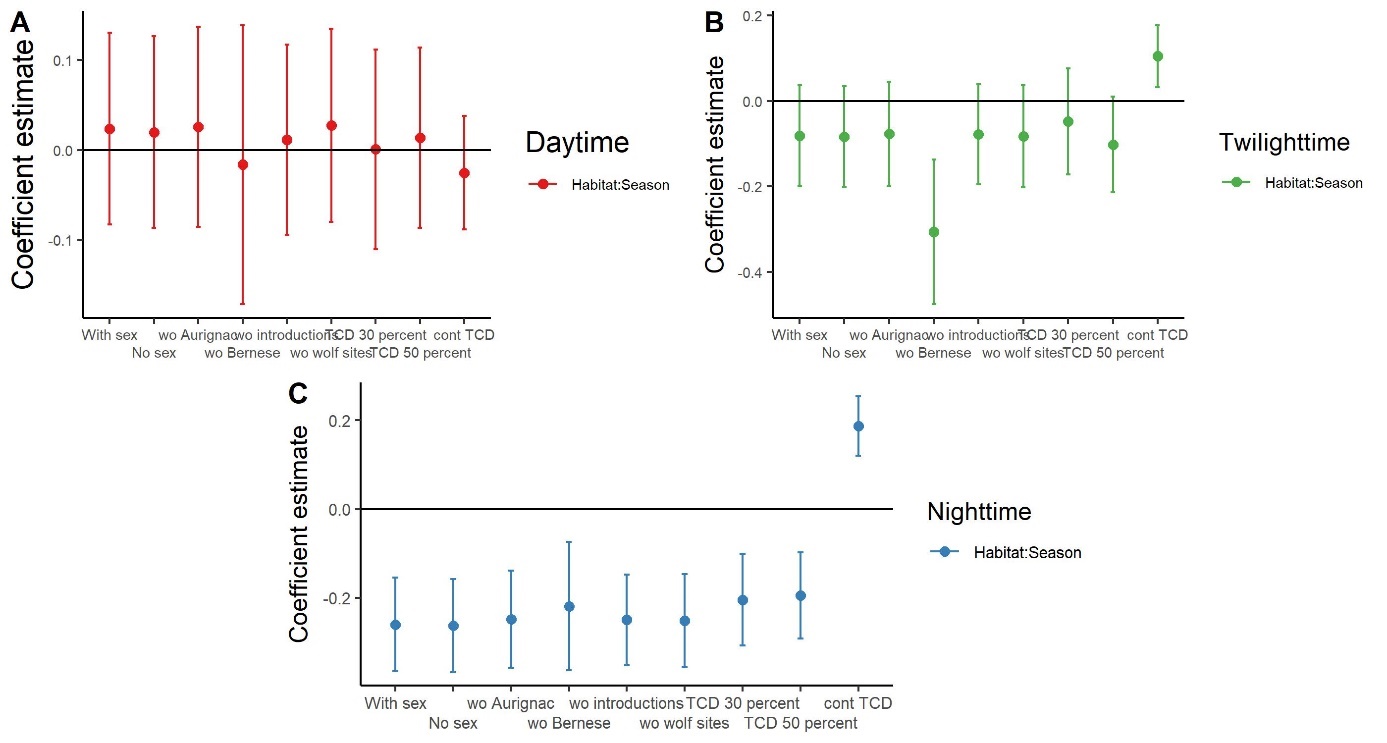


Habitat:Log step lengths


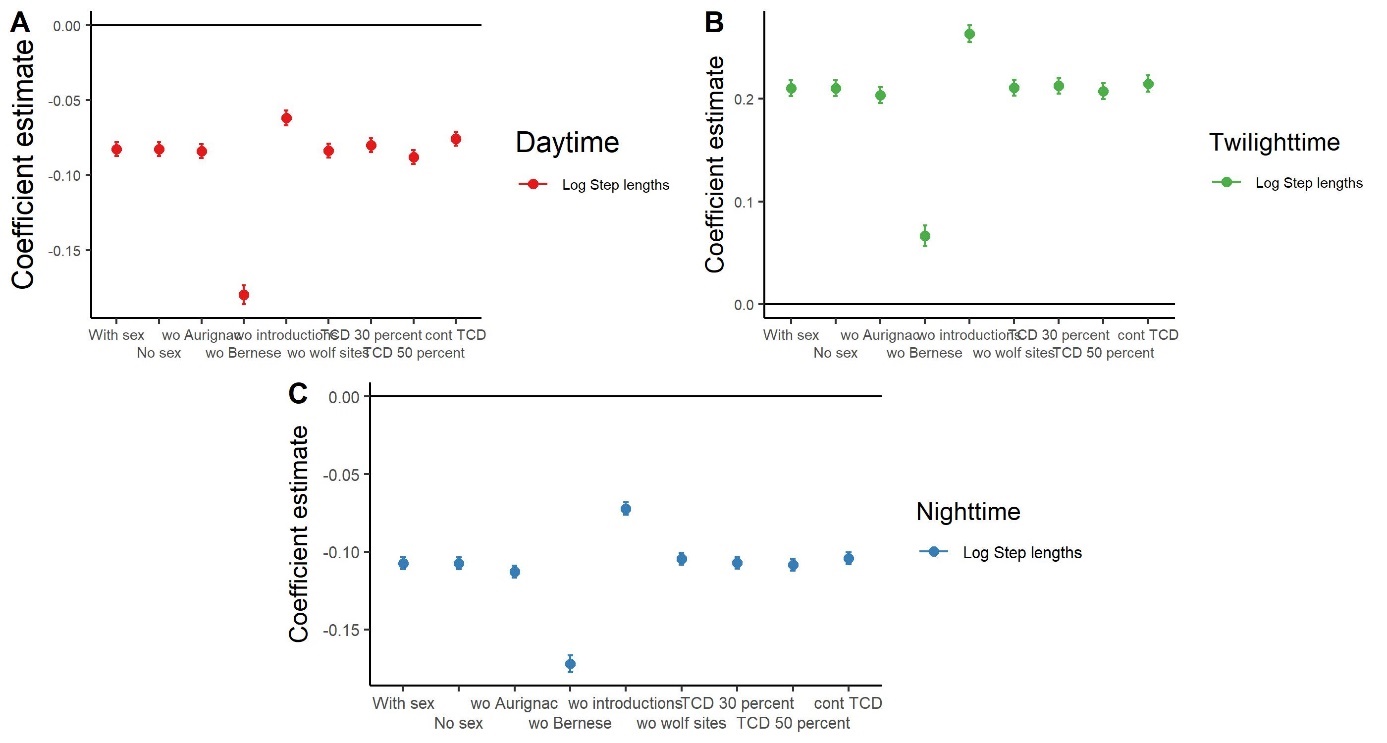


**Seasonal models S4 B**
1: final model (November GPS data with winter; 2: November GPS data with fall

Habitat (forest as reference category)


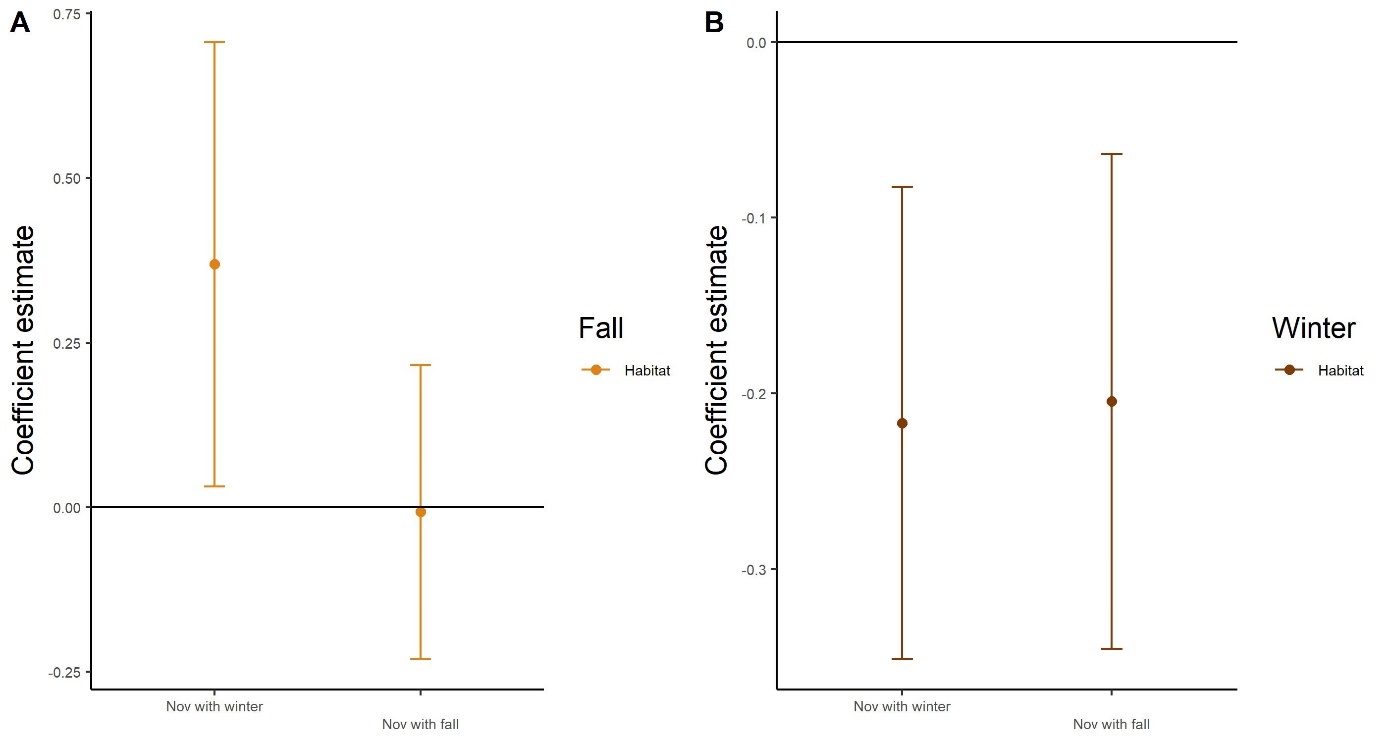


Habitat: Hunting


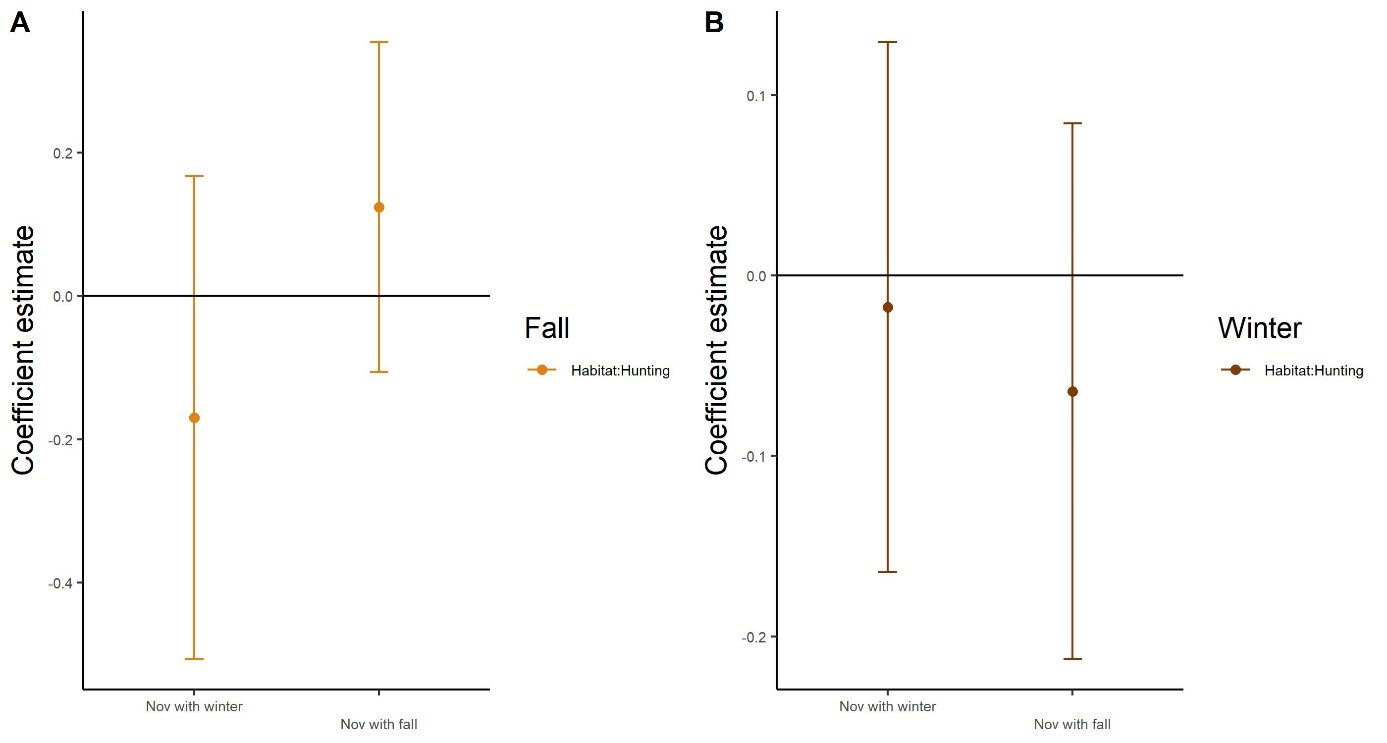


Habitat:Lynx


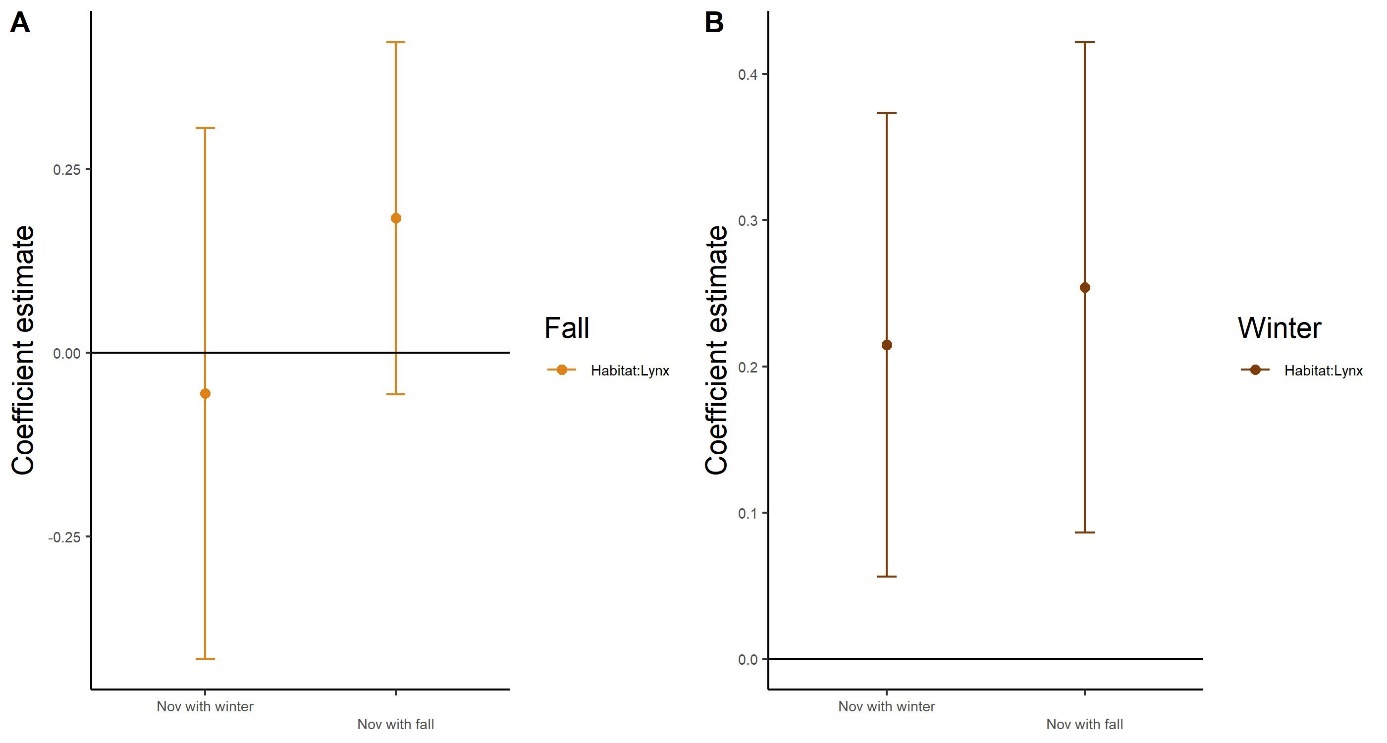


Habitat:Hunting:Lynx


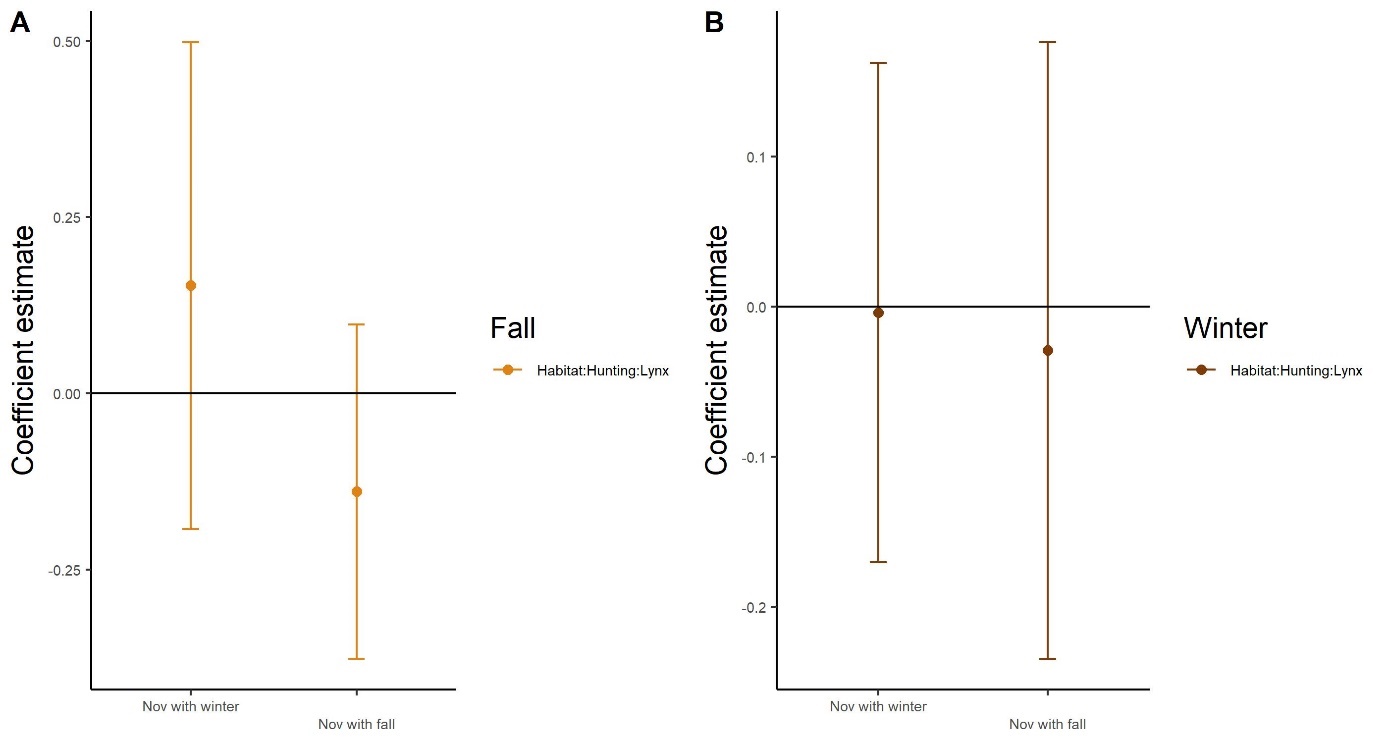


Habitat:Sex


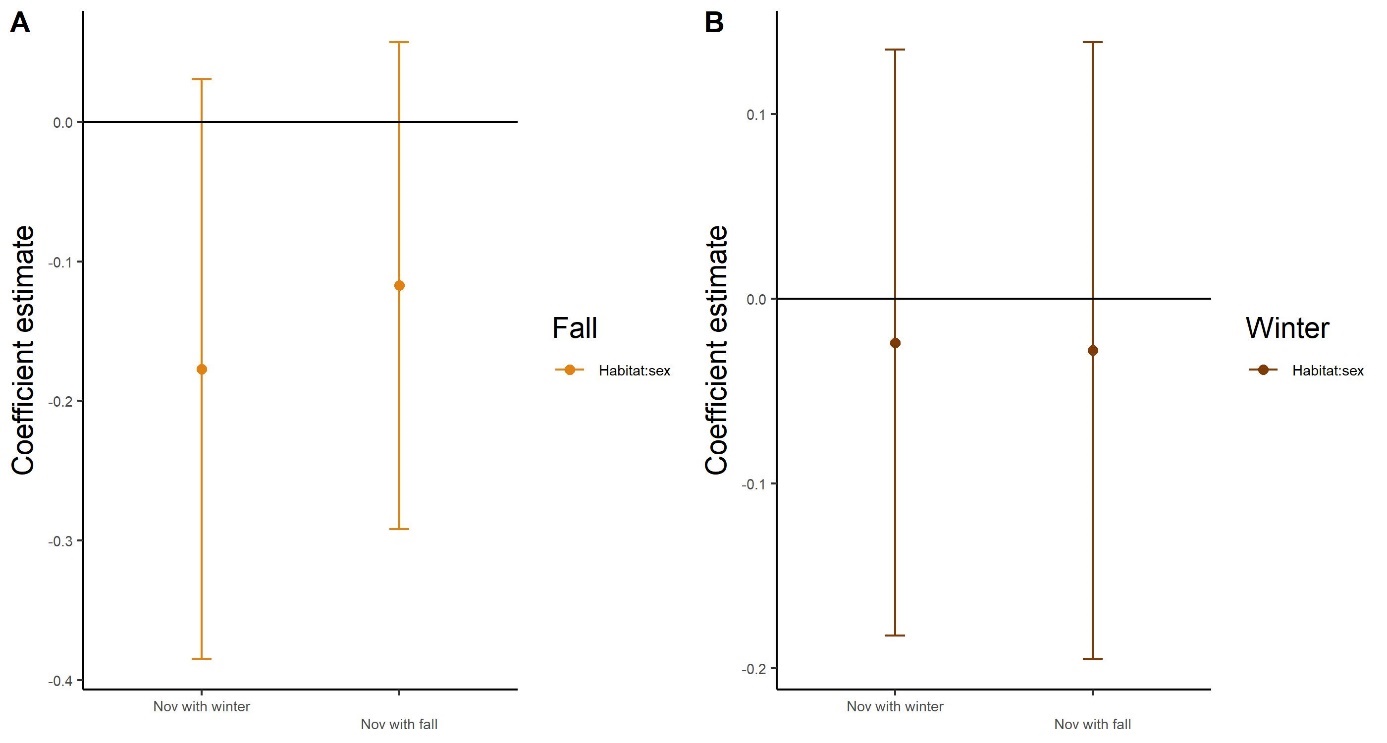


Habitat:Hunting:Sex


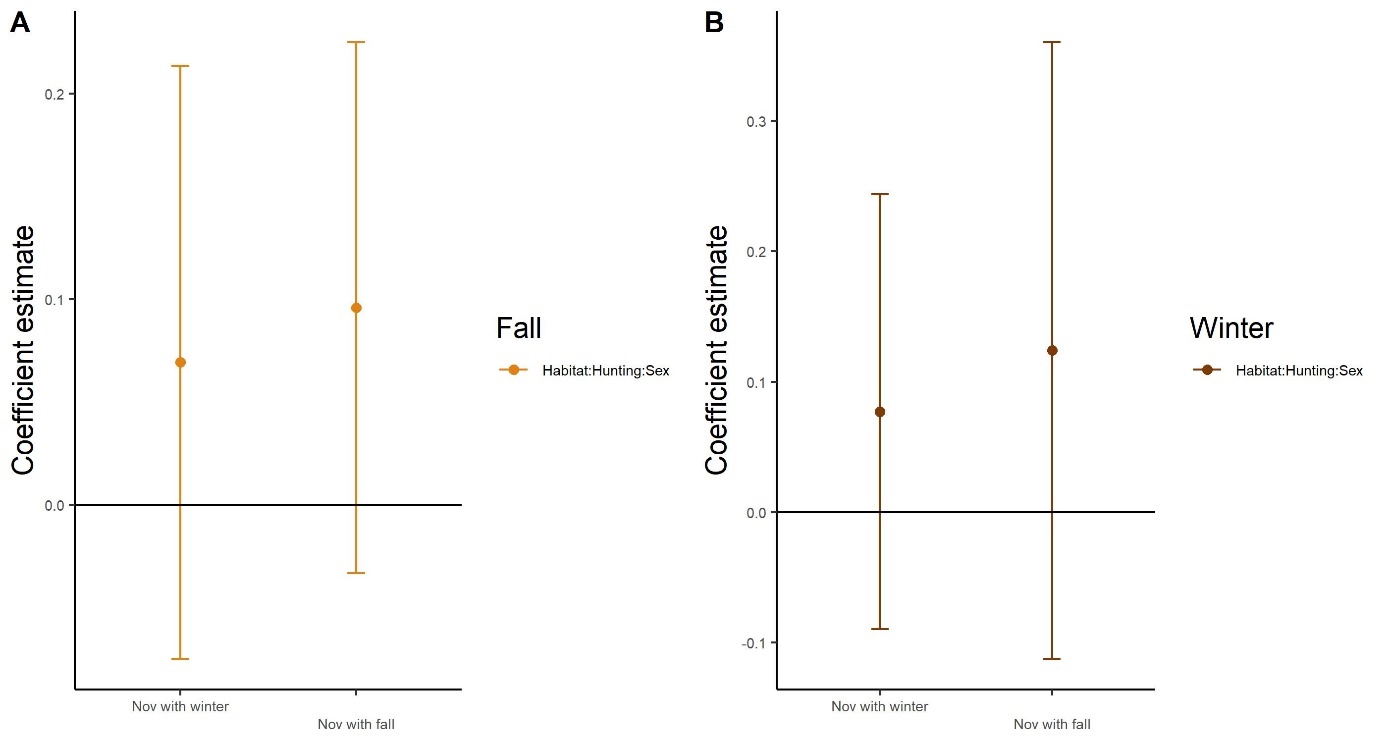


Habitat:HFI


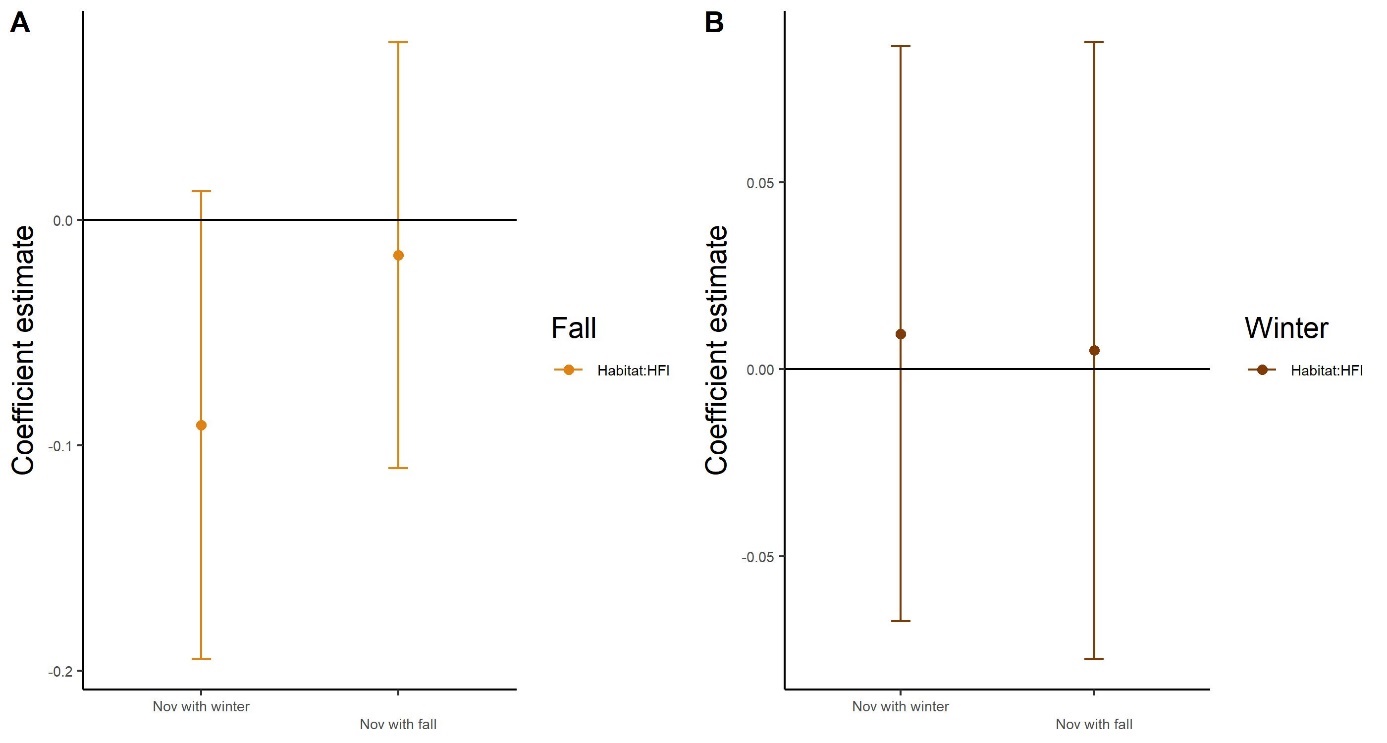


Habitat:NDVI


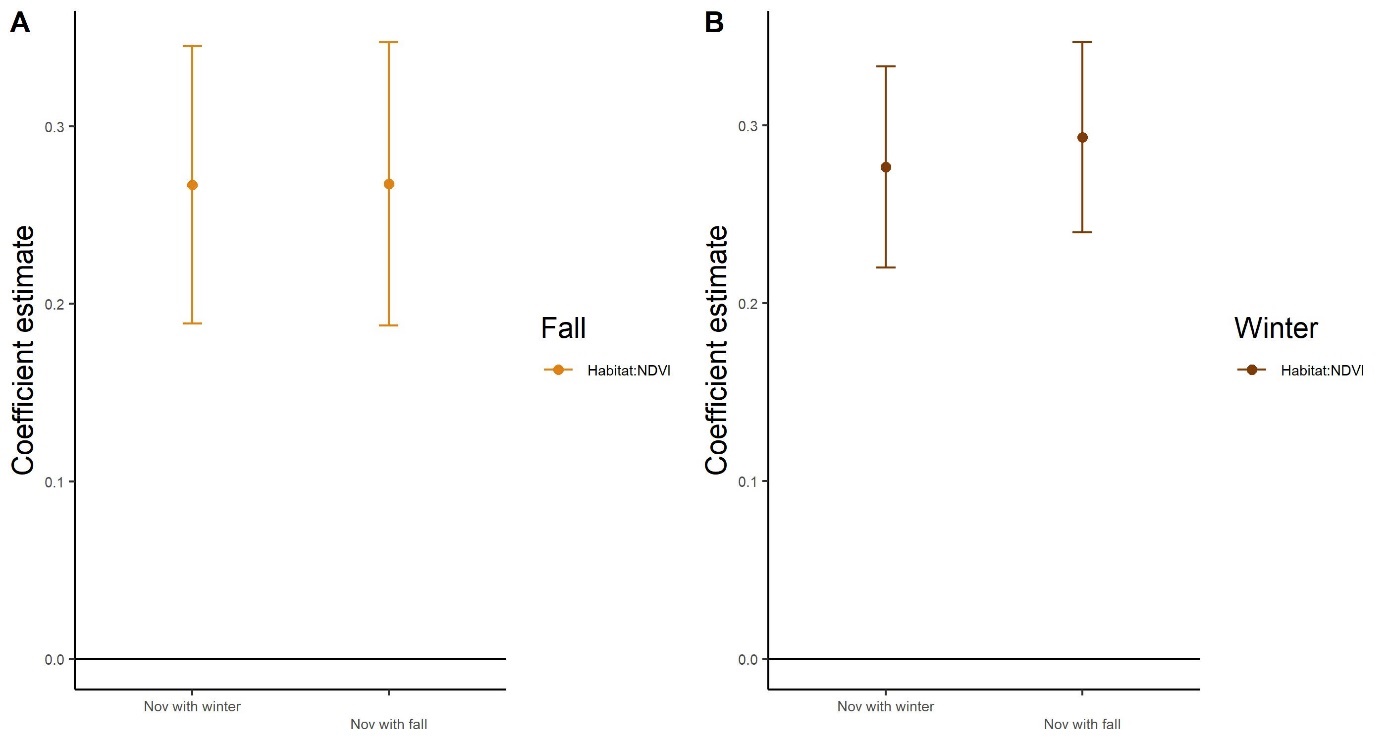


Habitat:Day


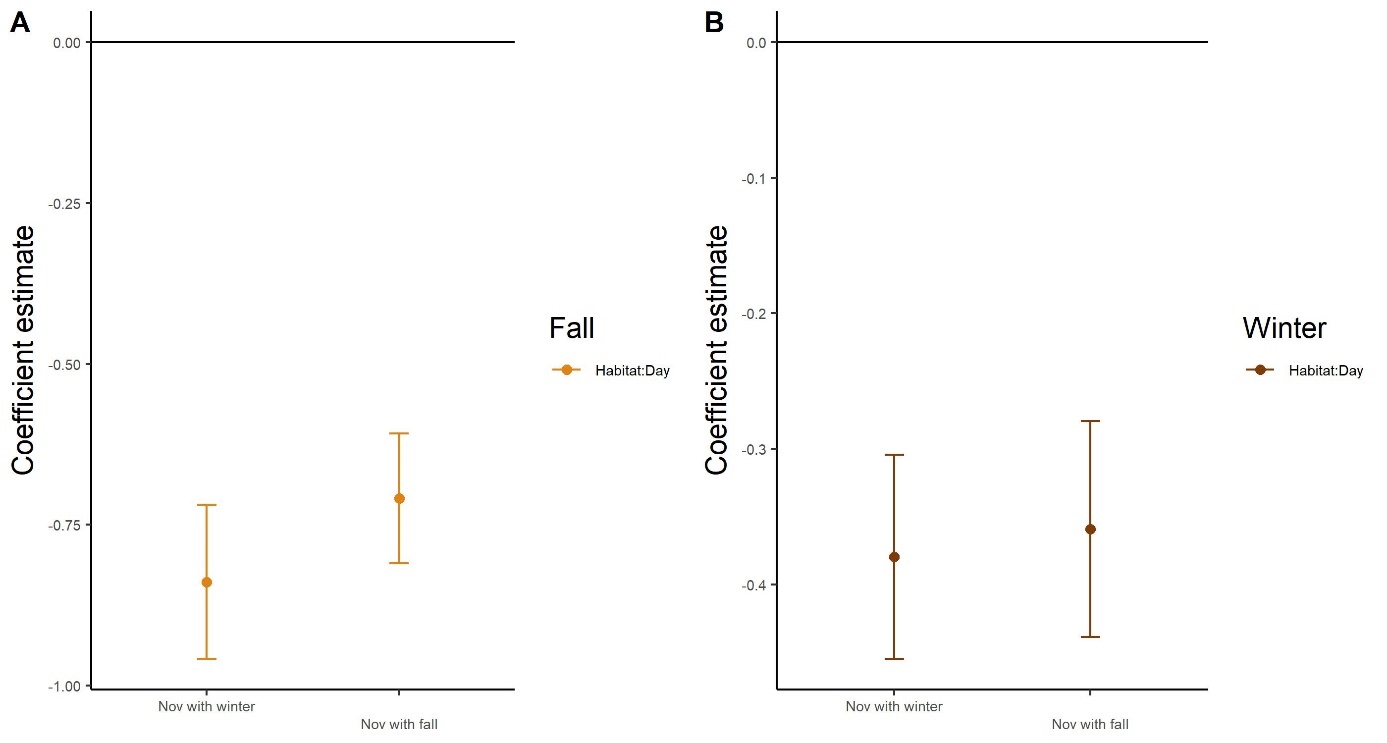


Habitat:Twilight


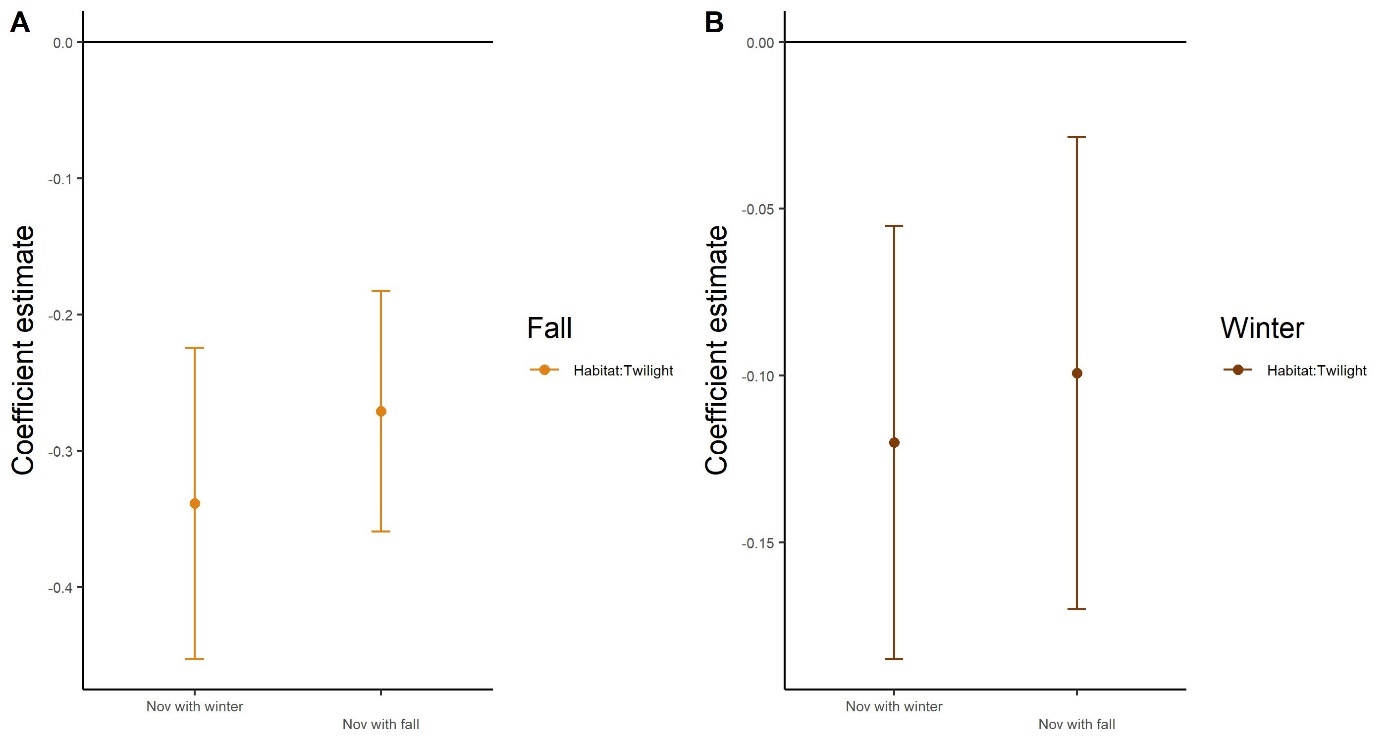


Habitat:Log step lengths


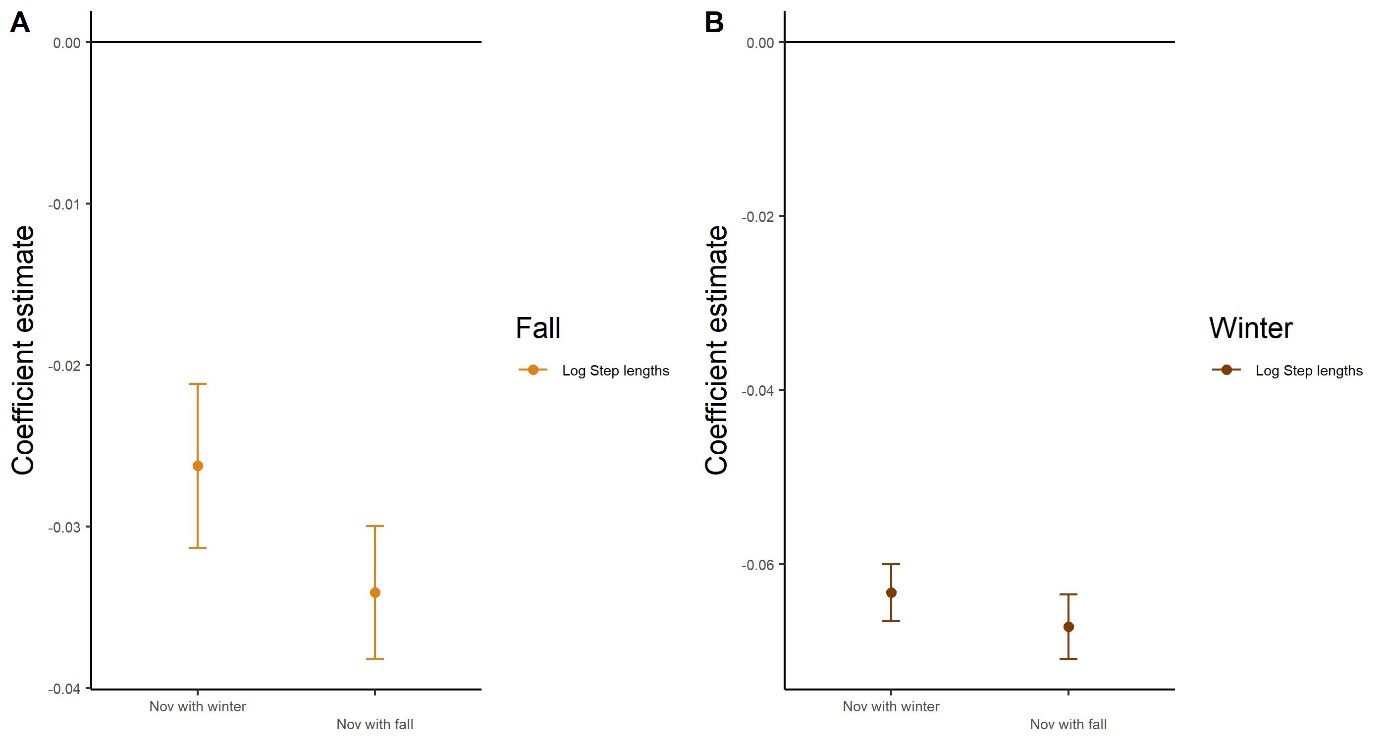

Supplement: Supplementary file 1 [file e7c4ba397f448218b1b86b5a.docx]
